# Supplementary material
Source: PubMed Central journal article supplement (PMC9974610)
Supplement: NIHMS1847688-supplement-Supp_Materials.pdf [file NIHMS1847688-supplement-Supp_Materials.pdf]

**SUPPLEMENTAL FIGURE 1**

**Univariate EFW trajectories among LGA births in the LIFECODES Fetal Growth Study. Red dashed lines indicate lines representing LGA (z-score = 1.28) and SGA (z-score = -1.28) cut points. Black dashed line indicates average growth (z-score = 0). Abbreviations: EFW = estimated fetal weight; LGA = large-for-gestational age; SGA = small-for-gestational age.**

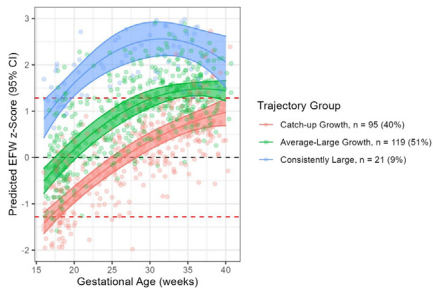

Bommarito. Fetal growth trajectories among large-for-gestational age births. *Am J Obstet Gynecol* 2022.

**SUPPLEMENTAL TABLE 1****Select demographics, pregnancy characteristics, and birth outcomes among all AGA births in the underlying LIFECODES cohort and the AGA births selected in the LIFECODES Fetal Growth Study**

|                                      | Median (25th, 75th percentile) or N (%) |                               |
|--------------------------------------|-----------------------------------------|-------------------------------|
|                                      | All AGA births in LIFECODES (N = 2,480) | AGA births selected (N = 411) |
| Age, years                           | 32.6 (28.5, 36.3)                       | 32.4 (28.8, 36.2)             |
| Education                            |                                         |                               |
| High school or less                  | 248 (11)                                | 49 (12)                       |
| Some college or associate degree     | 376 (17)                                | 89 (22)                       |
| Bachelor's degree or greater         | 1648 (73)                               | 268 (66)                      |
| Missing                              | 208                                     | 5                             |
| Race and ethnicity                   |                                         |                               |
| Non-Hispanic white                   | 1401 (58)                               | 243 (59)                      |
| Non-Hispanic Black                   | 343 (14)                                | 55 (13)                       |
| Hispanic                             | 391 (16)                                | 63 (15)                       |
| Other                                | 269 (11)                                | 50 (12)                       |
| Missing                              | 78                                      | 0                             |
| Health insurance                     |                                         |                               |
| Private                              | 1769 (72)                               | 298 (74)                      |
| Public                               | 682 (28)                                | 107 (26)                      |
| Missing                              | 29                                      | 6                             |
| Pre-pregnancy BMI, kg/m <sup>2</sup> | 24.8 (21.6, 29.5)                       | 24.8 (21.5, 29.2)             |
| Alcohol consumption in pregnancy     |                                         |                               |
| No                                   | 2273 (93)                               | 377 (93)                      |
| Yes                                  | 179 (7)                                 | 29 (7)                        |
| Missing                              | 28                                      | 5                             |
| Smoking in pregnancy                 |                                         |                               |
| No                                   | 2301 (93)                               | 379 (92)                      |
| Yes                                  | 174 (7)                                 | 32 (8)                        |
| Missing                              | 5                                       | 0                             |
| Primiparous                          |                                         |                               |
| No                                   | 1483 (60)                               | 254 (62)                      |
| Yes                                  | 997 (40)                                | 157 (38)                      |
| Infant sex <sup>e</sup>              |                                         |                               |
| Female                               | 1256 (51)                               | 199 (48)                      |
| Male                                 | 1222 (49)                               | 212 (52)                      |
| Missing                              | 2                                       | 0                             |
| Gestational age at delivery, weeks   | 39.0 (37.7, 39.7)                       | 39.0 (37.9, 39.7)             |
| Birthweight, kg                      | 3260 (2962, 3540)                       | 3245 (2965, 3532)             |

Abbreviations: AGA = appropriate-for-gestational age; BMI = body mass index.

Bommarito. Fetal growth trajectories among large-for-gestational age births. *Am J Obstet Gynecol* 2022.

**SUPPLEMENTAL TABLE 2****Select demographics, pregnancy characteristics, and birth outcomes among all LGA births in the underlying LIFECODES cohort and the LGA births selected in the LIFECODES Fetal Growth Study**

|                                      | Median (25th, 75th percentile) or N (%) |                               |
|--------------------------------------|-----------------------------------------|-------------------------------|
|                                      | All LGA births in LIFECODES (N = 283)   | LGA births selected (N = 241) |
| Age, years                           | 33.7 (29.6, 37.4)                       | 33.7 (29.6, 37.3)             |
| Education                            |                                         |                               |
| High school or less                  | 33 (12)                                 | 30 (13)                       |
| Some college or associate degree     | 37 (14)                                 | 36 (15)                       |
| Bachelor's degree or greater         | 201 (74)                                | 171 (72)                      |
| Missing                              | 12                                      | 4                             |
| Race and ethnicity                   |                                         |                               |
| Non-Hispanic white                   | 190 (71)                                | 161 (71)                      |
| Non-Hispanic Black                   | 33 (12)                                 | 29 (13)                       |
| Hispanic                             | 45 (17)                                 | 38 (17)                       |
| Other                                | 15                                      | 13                            |
| Health insurance                     |                                         |                               |
| Private                              | 212 (76)                                | 177 (74)                      |
| Public                               | 67 (24)                                 | 62 (26)                       |
| Missing                              | 4                                       | 2                             |
| Pre-pregnancy BMI, kg/m <sup>2</sup> | 26.9 (23.3, 32.8)                       | 27.0 (23.4, 32.5)             |
| Missing                              | 6                                       | 0                             |
| Alcohol consumption in pregnancy     |                                         |                               |
| No                                   | 272 (97)                                | 234 (97)                      |
| Yes                                  | 9 (3)                                   | 6 (3)                         |
| Missing                              | 2                                       | 0                             |
| Smoking in pregnancy                 |                                         |                               |
| No                                   | 275 (98)                                | 236 (98)                      |
| Yes                                  | 7 (2)                                   | 5 (2)                         |
| Missing                              | 1                                       | 0                             |
| Primiparous                          |                                         |                               |
| No                                   | 202 (71)                                | 171 (71)                      |
| Yes                                  | 81 (29)                                 | 70 (29)                       |
| Infant sex <sup>e</sup>              |                                         |                               |
| Female                               | 96 (34)                                 | 82 (34)                       |
| Male                                 | 187 (66)                                | 159 (66)                      |
| Gestational age at delivery, weeks   | 38.9 (37.9, 39.6)                       | 38.9 (38.0, 39.6)             |
| Birthweight, kg                      | 4130 (3930, 4281)                       | 4140 (3941, 4300)             |

Abbreviations: BMI = body mass index; LGA = large-for-gestational age

Bommarito. Fetal growth trajectories among large-for-gestational age births. *Am J Obstet Gynecol* 2022.

**SUPPLEMENTAL TABLE 3****Statistical criteria for the 4-group solution of multivariate trajectory models among parent-child pairs with an LGA birth**

| Group | Name                         | n  | %    | Average posterior inclusion probability | Odds of correct classification |
|-------|------------------------------|----|------|-----------------------------------------|--------------------------------|
| 1     | Catch-up Growth              | 28 | 11.9 | 0.94                                    | 103.7                          |
| 2     | Proportional AC:FL Growth    | 67 | 28.5 | 0.89                                    | 17.6                           |
| 3     | Disproportional AC:FL Growth | 96 | 40.9 | 0.84                                    | 8.6                            |
| 4     | Consistently Large           | 44 | 18.7 | 0.95                                    | 76.8                           |

Bommarito. Fetal growth trajectories among large-for-gestational age births. Am J Obstet Gynecol 2022.

**SUPPLEMENTAL TABLE 4****Demographics, pregnancy characteristics, and birth outcomes among multivariate fetal growth trajectories among parent-child pairs with an LGA birth in the LIFECODES Fetal Growth Study using a case-weight approach**

|                                      | Catch-up Growth   | Proportional AC:FL Growth | Disproportional AC:FL Growth | Consistently Large |
|--------------------------------------|-------------------|---------------------------|------------------------------|--------------------|
| Age, years                           | 32.0 (27.2, 37.1) | 32.2 (27.7, 37.2)         | 34.5 (30.3, 37.5)            | 33.6 (31.6, 37.3)  |
| Education                            |                   |                           |                              |                    |
| High school or less                  | 17                | 18                        | 10                           | 8                  |
| Some college or associate degree     | 26                | 20                        | 10                           | 13                 |
| Bachelor's degree or greater         | 57                | 63                        | 80                           | 78                 |
| Race and ethnicity                   |                   |                           |                              |                    |
| Non-Hispanic white                   | 53                | 56                        | 79                           | 67                 |
| Non-Hispanic Black                   | 18                | 19                        | 4                            | 16                 |
| Hispanic                             | 19                | 20                        | 15                           | 11                 |
| Other                                | 10                | 5                         | 3                            | 6                  |
| Health insurance                     |                   |                           |                              |                    |
| Private                              | 71                | 65                        | 80                           | 75                 |
| Public                               | 29                | 35                        | 20                           | 25                 |
| Pre-pregnancy BMI, kg/m <sup>2</sup> | 27.4 (23.7, 32.4) | 28.9 (24.1, 34.4)         | 25.8 (22.7, 31.1)            | 27.1 (22.7, 31.4)  |
| Height, inches                       | 65 (62, 67)       | 65 (63, 67)               | 65 (63, 67)                  | 65 (64, 67)        |
| Alcohol consumption in pregnancy     |                   |                           |                              |                    |
| No                                   | 100               | 98                        | 95                           | 99                 |
| Yes                                  | 0                 | 2                         | 5                            | 1                  |
| Smoking in pregnancy                 |                   |                           |                              |                    |
| No                                   | 100               | 98                        | 97                           | 97                 |
| Yes                                  | 0                 | 2                         | 3                            | 3                  |
| Primiparous                          |                   |                           |                              |                    |
| No                                   | 74                | 73                        | 66                           | 75                 |
| Yes                                  | 26                | 27                        | 34                           | 25                 |
| ART                                  |                   |                           |                              |                    |
| No                                   | 89                | 92                        | 80                           | 90                 |
| Yes                                  | 11                | 8                         | 20                           | 10                 |

Bommarito. Fetal growth trajectories among large-for-gestational age births. Am J Obstet Gynecol 2022.

(continued)

**SUPPLEMENTAL TABLE 4**
**Demographics, pregnancy characteristics, and birth outcomes among multivariate fetal growth trajectories among parent-child pairs with an LGA birth in the LIFECODES Fetal Growth Study using a case-weight approach (continued)**

|                                           | Catch-up Growth   | Proportional AC:FL Growth | Disproportional AC:FL Growth | Consistently Large |
|-------------------------------------------|-------------------|---------------------------|------------------------------|--------------------|
| <b>Preeclampsia</b>                       |                   |                           |                              |                    |
| No                                        | 90                | 96                        | 94                           | 96                 |
| Yes                                       | 10                | 4                         | 6                            | 4                  |
| <b>Glucose control</b>                    |                   |                           |                              |                    |
| Normal glucose metabolism                 | 41                | 65                        | 67                           | 73                 |
| Mild carbohydrate intolerance             | 11                | 10                        | 11                           | 13                 |
| Gestational diabetes                      | 14                | 11                        | 6                            | 3                  |
| Pre-gestational diabetes                  | 34                | 14                        | 16                           | 11                 |
| <b>Type of pre-existing diabetes</b>      |                   |                           |                              |                    |
| Type 1                                    | 81                | 59                        | 54                           | 70                 |
| Type 2                                    | 19                | 41                        | 46                           | 30                 |
| <b>Infant sex</b>                         |                   |                           |                              |                    |
| Female                                    | 37                | 42                        | 31                           | 28                 |
| Male                                      | 63                | 58                        | 69                           | 72                 |
| Gestational age at delivery, weeks        | 39.3 (37.9, 40.1) | 38.9 (38.4, 39.6)         | 38.9 (37.9, 39.4)            | 38.9 (38.0, 39.5)  |
| Birthweight z-score                       | 1.69 (1.42, 1.93) | 1.64 (1.46, 1.96)         | 1.76 (1.51, 2.04)            | 1.73 (1.52, 2.25)  |
| Birthweight, kg                           | 4174 (4049, 4328) | 4107 (3965, 4273)         | 4167 (3916, 4306)            | 4137 (3929, 4391)  |
| Birthweight - length ratio, gm/cm         | 80.6 (77.4, 83.7) | 78.6 (76.7, 81.8)         | 79.3 (75.8, 82.1)            | 78.9 (75.8, 82.8)  |
| <b>Delivery via C-section</b>             |                   |                           |                              |                    |
| No                                        | 50                | 45                        | 36                           | 53                 |
| Yes                                       | 50                | 55                        | 64                           | 47                 |
| <b>Delivery via unscheduled C-section</b> |                   |                           |                              |                    |
| No                                        | 54                | 64                        | 61                           | 55                 |
| Yes                                       | 46                | 36                        | 39                           | 45                 |
| <b>NICU Admission</b>                     |                   |                           |                              |                    |
| No                                        | 66                | 83                        | 80                           | 85                 |
| Yes                                       | 34                | 17                        | 20                           | 15                 |
| Length of NICU Stay, days                 | 4 (3, 12)         | 4 (3, 5)                  | 7 (4, 16)                    | 3 (2, 5)           |

Note: n = 4 missing education, n = 2 missing health insurance, n = 2 missing pre-pregnancy BMI, n = 1 missing alcohol consumption during pregnancy, n = 17 missing measures of glucose control, n = 14 missing birthweight-length ratio, n = 1 missing delivery via C-section, n = 5 missing delivery via unscheduled C-section, n = 5 missing NICU admission. Other race and ethnicity includes Asian (n = 5), More than one race (n = 5) and Other (n = 2). Public insurance category includes those using Medicaid/Mass Health/SSI (n = 61) and Self pay (n = 1). Type of pregestational diabetes only displayed for individuals diagnosed with pregestational diabetes (n = 36). Unscheduled C-section only displayed among individuals with a C-section delivery (n = 131). Length of NICU stay only calculated among individuals with a known NICU admission (n = 46).

Abbreviations: ART = assisted reproductive technologies, BMI = body mass index, LGA = large-for-gestational age, NICU = neonatal intensive care unit  
 Bommarito. Fetal growth trajectories among large-for-gestational age births. *Am J Obstet Gynecol* 2022.

**SUPPLEMENTAL TABLE 5****Comparison of trajectory group membership with macrosomia among babies born LGA**

|                                       | Macrosomia <sup>a</sup> |         |
|---------------------------------------|-------------------------|---------|
|                                       | No                      | Yes     |
| Group 1: Catch-up Growth              | 4 (14)                  | 24 (86) |
| Group 2: Proportional AC:FL Growth    | 20 (30)                 | 47 (70) |
| Group 3: Disproportional AC:FL Growth | 32 (33)                 | 64 (67) |
| Group 4: Consistently Large           | 12 (27)                 | 32 (73) |

<sup>a</sup> Macrosomia defined as birthweight > 4000 g.

Bommarito. *Fetal growth trajectories among large-for-gestational age births. Am J Obstet Gynecol* 2022.

**SUPPLEMENTAL TABLE 6****Demographics, pregnancy characteristics, and birth outcomes in univariate EFW trajectories among parent-child pairs with an LGA birth in the LIFECODES Fetal Growth Study**

|                                      | Median (25th, 75th percentile) or N (%) |                                |                             |
|--------------------------------------|-----------------------------------------|--------------------------------|-----------------------------|
|                                      | Catch-up Growth (N = 95)                | Average-Large Growth (N = 119) | Consistently Large (n = 21) |
| Age, years                           | 32.9 (27.7, 37.3)                       | 33.8 (29.8, 37.4)              | 33.6 (32.5, 37.3)           |
| Education                            |                                         |                                |                             |
| High school or less                  | 14 (15)                                 | 14 (12)                        | 2 (10)                      |
| Some college or associate degree     | 19 (20)                                 | 15 (13)                        | 2 (10)                      |
| Bachelor's degree or greater         | 61 (65)                                 | 87 (75)                        | 17 (81)                     |
| Race and ethnicity                   |                                         |                                |                             |
| Non-Hispanic white                   | 60 (63)                                 | 81 (68)                        | 15 (71)                     |
| Non-Hispanic Black                   | 11 (12)                                 | 16 (13)                        | 2 (10)                      |
| Hispanic                             | 17 (18)                                 | 19 (16)                        | 2 (10)                      |
| Other                                | 7 (7)                                   | 3 (3)                          | 2 (10)                      |
| Health insurance                     |                                         |                                |                             |
| Private                              | 67 (71)                                 | 89 (75)                        | 15 (75)                     |
| Public                               | 28 (29)                                 | 29 (25)                        | 5 (25)                      |
| Pre-pregnancy BMI, kg/m <sup>2</sup> | 26.6 (23.7, 31.9)                       | 27.5 (23.3, 32.8)              | 26.6 (22.7, 32.5)           |
| Height, inches                       | 66 (63, 68)                             | 65 (64, 67)                    | 66 (64, 67)                 |
| Alcohol consumption in pregnancy     |                                         |                                |                             |
| No                                   | 94 (99)                                 | 113 (96)                       | 21 (100)                    |
| Yes                                  | 1 (1)                                   | 5 (4)                          | 0 (0)                       |
| Smoking in pregnancy                 |                                         |                                |                             |
| No                                   | 95 (100)                                | 114 (96)                       | 21 (100)                    |
| Yes                                  | 0 (0)                                   | 5 (4)                          | 0 (0)                       |
| Primiparous                          |                                         |                                |                             |
| No                                   | 65 (68)                                 | 85 (71)                        | 17 (81)                     |
| Yes                                  | 30 (32)                                 | 34 (29)                        | 4 (19)                      |

Bommarito. *Fetal growth trajectories among large-for-gestational age births. Am J Obstet Gynecol* 2022.

(continued)

**SUPPLEMENTAL TABLE 6**
**Demographics, pregnancy characteristics, and birth outcomes in univariate EFW trajectories among parent-child pairs with an LGA birth in the LIFECODES Fetal Growth Study (continued)**

|                                    | Median (25th, 75th percentile) or N (%) |                                |                             |
|------------------------------------|-----------------------------------------|--------------------------------|-----------------------------|
|                                    | Catch-up Growth (N = 95)                | Average-Large Growth (N = 119) | Consistently Large (n = 21) |
| ART                                |                                         |                                |                             |
| No                                 | 84 (88)                                 | 100 (84)                       | 19 (90)                     |
| Yes                                | 11 (12)                                 | 19 (16)                        | 2 (10)                      |
| Preeclampsia                       |                                         |                                |                             |
| No                                 | 90 (95)                                 | 113 (95)                       | 19 (90)                     |
| Yes                                | 5 (5)                                   | 6 (5)                          | 2 (10)                      |
| Glucose control                    |                                         |                                |                             |
| Normal glucose metabolism          | 54 (64)                                 | 71 (63)                        | 15 (71)                     |
| Mild carbohydrate intolerance      | 7 (8)                                   | 16 (14)                        | 1 (5)                       |
| Gestational diabetes               | 9 (11)                                  | 9 (8)                          | 0 (0)                       |
| Pre-gestational diabetes           | 15 (18)                                 | 16 (14)                        | 5 (24)                      |
| Type of pre-gestational diabetes   |                                         |                                |                             |
| Type 1                             | 12 (80)                                 | 8 (50)                         | 3 (60)                      |
| Type 2                             | 3 (20)                                  | 8 (50)                         | 2 (40)                      |
| Infant sex                         |                                         |                                |                             |
| Female                             | 31 (33)                                 | 44 (37)                        | 6 (29)                      |
| Male                               | 64 (67)                                 | 75 (63)                        | 15 (71)                     |
| Gestational age at delivery, weeks | 39.3 (38.4, 40.3)                       | 38.9 (37.9, 39.4)              | 38.4 (37.0, 39.0)           |
| Birthweight z-score                | 1.64 (1.47, 1.94)                       | 1.77 (1.51, 2.06)              | 1.94 (1.63, 2.57)           |
| Birthweight, kg                    | 4150 (3969, 4310)                       | 4150 (3915, 4253)              | 4119 (3960, 4455)           |
| Birthweight - length ratio, gm/cm  | 79.7 (76.9, 83.4)                       | 79.3 (76.1, 81.9)              | 79.1 (74.7, 85.1)           |
| Delivery via C-section             |                                         |                                |                             |
| No                                 | 48 (51)                                 | 46 (39)                        | 9 (43)                      |
| Yes                                | 47 (49)                                 | 72 (61)                        | 12 (57)                     |
| Delivery via unscheduled C-section |                                         |                                |                             |
| No                                 | 24 (53)                                 | 45 (64)                        | 7 (64)                      |
| Yes                                | 21 (47)                                 | 25 (36)                        | 4 (36)                      |
| NICU Admission                     |                                         |                                |                             |
| No                                 | 72 (77)                                 | 95 (81)                        | 17 (89)                     |
| Yes                                | 22 (23)                                 | 22 (19)                        | 2 (11)                      |
| Length of NICU Stay, days          | 5 (4, 16)                               | 4 (3, 10)                      | -                           |

Abbreviations: AGA = appropriate-for-gestational age, ART = assisted reproductive technologies, BMI = body mass index, LGA = large-for-gestational age, NICU = neonatal intensive care unit.

Note: n = 4 missing education, n = 2 missing health insurance, n = 2 missing pre-pregnancy BMI, n = 1 missing alcohol consumption during pregnancy, n = 17 missing measures of glucose control, n = 14 missing birthweight-length ratio, n = 1 missing delivery via C-section, n = 5 missing delivery via unscheduled C-section, n = 5 missing NICU admission. Other race and ethnicity includes Asian (n = 5), More than one race (n = 5) and Other (n = 2). Public insurance category includes those using Medicaid/Mass Health/SSI (n = 61) and Self pay (n = 1). Type of pregestational diabetes only displayed for individuals diagnosed with pregestational diabetes (n = 36). Unscheduled C-section only displayed among individuals with a C-section delivery (n = 131). Length of NICU stay only calculated among individuals with a known NICU admission (n = 46).

Bommarito. Fetal growth trajectories among large-for-gestational age births. *Am J Obstet Gynecol* 2022.

**SUPPLEMENTAL TABLE 7****N (%) comparing univariate and multivariate trajectory group membership among babies born LGA**

|                               |                              | Univariate Trajectory Group |                      |                    |
|-------------------------------|------------------------------|-----------------------------|----------------------|--------------------|
|                               |                              | Catch-up Growth             | Average-Large Growth | Consistently Large |
| Multivariate Trajectory Group | Catch-up Growth              | 27 (28)                     | 1 (1)                | 0 (0)              |
|                               | Proportional AC:FL Growth    | 39 (41)                     | 28 (24)              | 0 (0)              |
|                               | Disproportional AC:FL Growth | 29 (31)                     | 66 (55)              | 1 (5)              |
|                               | Consistently Large           | 0 (0)                       | 24 (20)              | 20 (95)            |

*Bommarito. Fetal growth trajectories among large-for-gestational age births. Am J Obstet Gynecol 2022.*
